## Determinants of hepatocellular carcinoma in cirrhotic patients treated with nucleos(t)ide analogues for chronic hepatitis B

Yao-Chun Hsu<sup>1,2</sup>, Chun-Ying Wu<sup>1,3,4</sup>, Hsien-Yuan Lane<sup>1</sup>, Chi-Yang Chang<sup>2</sup>, Chi-Ming Tai<sup>2</sup>, Cheng-Hao Tseng<sup>2</sup>, Gin-Ho Lo<sup>2</sup>, Daw-Shyong Perng<sup>2</sup>, Jaw-Town Lin<sup>5</sup>† and Lein-Ray Mo<sup>2\*</sup>†

<sup>1</sup>Graduate Institute of Clinical Medicine, China Medical University, Taichung, Taiwan; <sup>2</sup>Division of Gastroenterology and Hepatology, Department of Internal Medicine, E-Da Hospital/I-Shou University, Kaohsiung, Taiwan; <sup>3</sup>School of Medicine, National Yang-Ming University, Taipei, Taiwan; <sup>4</sup>Division of Gastroenterology, Taichung Veterans General Hospital, Taichung, Taiwan; <sup>5</sup>School of Medicine, Fu Jen Catholic University, New Taipei, Taiwan

\*Corresponding author. Tel: +886-7-6150011, ext. 2978; Fax: +886-7-6150940; E-mail: moleinray@gmail.com  
†Jaw-Town Lin and Lein-Ray Mo supervised and contributed equally to this work.

Received 20 July 2013; returned 26 September 2013; revised 27 January 2014; accepted 1 February 2014

**Objectives:** We aimed to identify determinants of hepatocellular carcinoma (HCC) in cirrhotic patients who received nucleos(t)ide analogues for chronic hepatitis B (CHB).

**Patients and methods:** This retrospective-prospective study screened all patients ( $n=1630$ ) who received antiviral therapy for CHB between 1 September 2007 and 31 March 2013 at the E-Da Hospital and enrolled 210 consecutive cirrhotic patients with pretreatment viral DNA  $>2000$  IU/mL. Those who developed HCC within 3 months of treatment were excluded. All participants were observed until occurrence of HCC, death or 1 January 2014. The incidence and determinants of HCC were estimated using competing risk analyses adjusted for mortality.

**Results:** Thirty-five (16.7%) patients developed HCC during a median follow-up of 25.2 months (IQR, 16.3–37.3 months), with a cumulative incidence of 24.1% (95% CI, 16.3%–32.0%) at 5 years. Multivariate-adjusted analyses identified age  $>55$  years [adjusted hazard ratio (HR), 2.19; 95% CI, 1.03–4.66], male gender (adjusted HR, 3.07; 95% CI, 1.05–9.02), model for end-stage liver disease (MELD) score  $>12$  points (adjusted HR, 2.16; 95% CI, 1.10–4.23) and diabetes mellitus (DM; adjusted HR, 3.49; 95% CI, 1.54–7.91) as independent risk factors after adjusting for multiple covariates, including antidiabetes medication. A scoring formula that used information on age, gender, MELD score, DM and antidiabetes regimen significantly discriminated patients at high or low risk of HCC, with sensitivity and specificity of 82.9% and 62.3%, respectively.

**Conclusions:** Age, gender, hepatic dysfunction, DM and medication for DM are baseline factors that stratify the risk of HCC in cirrhotic patients who receive nucleos(t)ide analogues for CHB.

**Keywords:** hepatitis B virus, liver cirrhosis, antiviral therapy, diabetes mellitus, risk stratification

### Introduction

Hepatitis B virus (HBV) infection is the leading aetiology of liver-related morbidity and mortality, globally accounting for  $>50\%$  of hepatocellular carcinomas (HCCs).<sup>1,2</sup> Transcriptional and translational activity of the virus drives hepatocellular carcinogenesis in the natural history of chronic hepatitis B (CHB).<sup>3,4</sup> Through inhibition of the viral polymerase, antiviral therapy using a nucleos(t)ide analogue (NUC) potently suppresses HBV replication.<sup>5</sup> It can effectively ameliorate hepatitis, attenuate liver fibrosis and delay disease progression.<sup>6</sup> Even overt cirrhosis may regress after long-term NUC therapy.<sup>7,8</sup> Furthermore, a

growing body of data has indicated that NUC treatment is associated with reduced occurrence and recurrence of HBV-related HCC.<sup>9,10</sup>

Antiviral therapy may decrease but nevertheless does not eliminate the risk of HCC.<sup>11</sup> Some patients, especially those with existing cirrhosis, still develop HCC despite taking NUCs. The outcome determinants have not been elucidated in patients under antiviral treatment and risk stratification in treated patients cannot rely on knowledge learned from untreated cohorts. This study aimed to investigate the chronological pattern and pretreatment risk factors for HCC in a CHB cohort with cirrhosis under continuous NUC therapy.

## Patients and methods

### Study design and patient population

This was a retrospective-prospective cohort study conducted in a teaching hospital in Taiwan (E-Da Hospital, Kaohsiung, Taiwan). The institutional review board of the hospital approved this study (protocol identification: EMRP-102-010). Through a computerized database, we first identified all CHB patients who received NUC between 1 September 2007 and 31 March 2013 and then manually reviewed their medical records to determine eligibility. The inclusion criteria were a positive serology of hepatitis B surface antigen or a documented history of HBV infection for  $\geq 6$  months, antiviral treatment with NUCs, presence of cirrhosis and serum HBV DNA  $> 2000$  IU/mL. Cirrhosis was either histopathologically or clinically diagnosed. Clinical diagnosis was based principally on the sonographic evaluation of the liver surface, parenchyma, vascular structure and splenomegaly.<sup>12</sup> In the absence of histological proof, reimbursement of NUCs for the indication of CHB-related cirrhosis required the presence of splenomegaly or oesophagogastric varices in addition to sonographic diagnosis.<sup>9</sup> Those who met any of the following criteria were excluded: superimposed infection with hepatitis C virus or HIV, any malignant disease, organ transplantation, prior exposure to NUC or interferon and occurrence of HCC within 3 months of therapy.

### Antiviral treatment with NUC and surveillance for HCC

Enrolled patients received 100 mg of lamivudine, 0.5 mg of entecavir, 600 mg of telbivudine or 300 mg of tenofovir once daily. Adefovir was not used in the first line but was restricted to the rescue setting, per the regulation of the Taiwan National Health Insurance. For those who acquired on-treatment virological breakthrough, adefovir at a daily dose of 10 mg was added. Occasionally, the dosage might vary according to individual conditions such as renal impairment. All patients were followed up at an interval of  $\leq 3$  months. All received HCC surveillance by means of ultrasonography and serum  $\alpha$ -fetoprotein every 3 months in general.<sup>13</sup> HCC was diagnosed according to international guidelines.<sup>2</sup> Non-invasive diagnosis must fulfil characteristic features on dynamic images. Patients were observed from the initiation of NUC therapy until occurrence of HCC, death, loss to follow-up or 1 January 2014.

### Assessment of clinical parameters and laboratory measurements

We manually reviewed and recorded clinical and laboratory data from the computerized database, including the behaviour of alcohol consumption with regard to the duration of drinking, types of beverage and average amount per day. In principle, alcoholism was defined if the consumption exceeded 40 g in men and 20 g in women on a daily basis for 5 years.<sup>14</sup> The accuracy of the collected information was audited by the principal investigator (Y.-C. H.), who also ascertained the outcome of each enrolled subject. The serology of HBV was assayed by immunoassays (Abbott GmbH & Co., Wiesbaden, Germany). The serum level of hepatitis B s antigen was semi-quantified with the upper bound of 250 IU/mL, per the manufacturer's protocol. Viral DNA was measured by the branched DNA assay (VERSANT<sup>®</sup> 440 Molecular System; Siemens Healthcare Diagnostics Inc., Tarrytown, NY, USA) before 1 May 2010 and afterward by the real-time PCR method (Roche COBAS<sup>®</sup> TaqMan<sup>®</sup> 48; Roche Diagnostics, Basel, Switzerland). The detection range was 357–17857100 IU/mL for the former assay and 6–110000000 IU/mL for the latter. The viral load was logarithmically transformed for expression and values above the measurable range were recorded at 1 log above the upper bound. Virological breakthrough was defined if HBV DNA resurged to  $> 10$ -fold from nadir; signature mutations for resistance were then sought. The model for end-stage liver disease (MELD) score,<sup>15</sup> the

aspartate aminotransferase-to-platelet ratio index (APRI)<sup>16</sup> and the risk estimation for HCC in CHB (REACH-B) score were computed according to the original formulas.<sup>17</sup>

### Data analysis

Continuous variables are expressed as the median (IQR) and categorical variables are expressed as  $n$  (%). Death occurring prior to HCC was considered as a competing risk event. The modified Kaplan–Meier method and Gray's method were used to calculate the cumulative incidence of HCC.<sup>18</sup> Independent factors associated with HCC were analysed by the modified Cox proportional hazard model that was adjusted for competing risks and multiple covariates.<sup>19</sup> The hazard ratio (HR) along with its 95% CI was reported. Data were managed and analysed by commercially available software (Stata, version 9.1; Stata Corp, College Station, TX, USA). The competing risk analyses were performed using R software with the `cmprsk_2.1-4` package. A  $P$  value  $< 0.05$  defined statistical significance.

## Results

### Baseline characteristics of the study population

After screening a total of 1630 consecutive patients (Figure 1), we finally enrolled 210 patients into the analysis (Table 1). Thirty of the 49 diabetic patients had been using metformin. Drug resistance was detected in two patients taking entecavir (1.1%

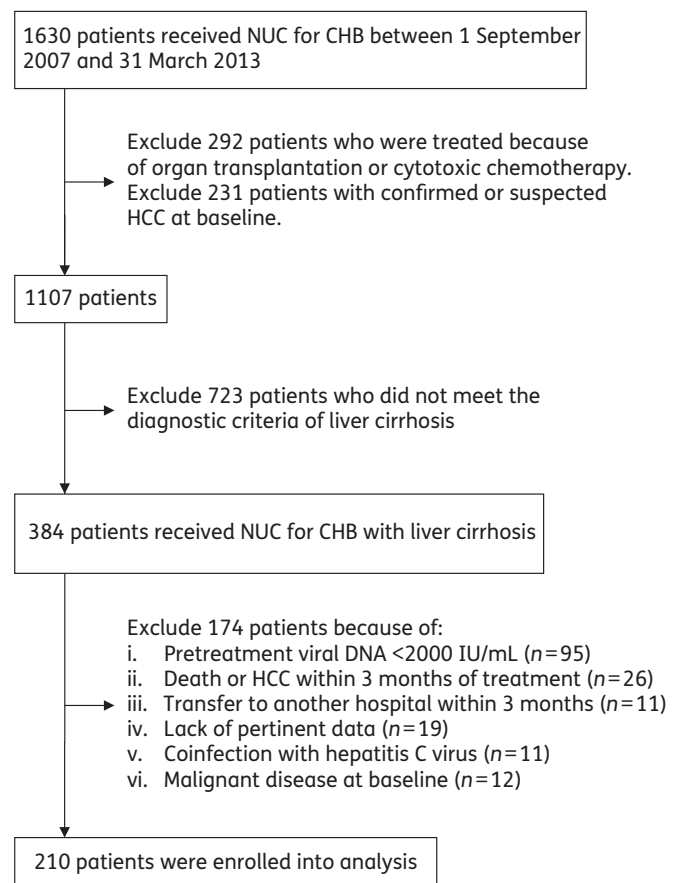

Figure 1. Flow chart of the enrolment process.

**Table 1.** Baseline characteristics of the study cohort

| Characteristics                    | All (n=210)         | No HCC (n=175)     | HCC (n=35)          | P      |
|------------------------------------|---------------------|--------------------|---------------------|--------|
| Age, years                         | 52.8 (46.0, 60.3)   | 52.0 (45.1, 59.9)  | 57.1 (50.8, 62.0)   | 0.01   |
| Male gender, n (%)                 | 154 (73.3)          | 123 (70.3)         | 31 (88.6)           | 0.04   |
| Body mass index, kg/m <sup>2</sup> | 25.6 (23.0, 28.2)   | 25.7 (23.0, 28.2)  | 24.0 (23.0, 26.4)   | 0.15   |
| HBeAg positive, n (%)              | 46 (21.9)           | 38 (21.7)          | 8 (22.9)            | 0.83   |
| HBV DNA, log IU/mL                 | 5.52 (4.22, 6.40)   | 5.44 (4.26, 6.31)  | 5.85 (4.21, 6.77)   | 0.49   |
| HBsAg >100 IU/mL, n (%)            | 190 (90.5)          | 159 (90.9)         | 31 (88.6)           | 0.75   |
| AST, IU/L                          | 66 (47, 98)         | 60 (43, 92)        | 86 (65, 127)        | 0.0003 |
| ALT, IU/L                          | 54 (42, 87)         | 53 (41, 83)        | 64 (48, 112)        | 0.07   |
| α-Fetoprotein, ng/mL               | 7.77 (4.86, 15.84)  | 7.2 (4.7, 13.1)    | 14.3 (7.5, 26.6)    | 0.003  |
| Bilirubin, mg/dL                   | 1.26 (0.92, 1.77)   | 1.25 (0.91, 1.74)  | 1.38 (0.98, 2.34)   | 0.73   |
| INR                                | 1.12 (1.04, 1.22)   | 1.12 (1.03, 1.19)  | 1.16 (1.09, 1.28)   | 0.03   |
| Creatinine, mg/dL                  | 1.1 (1.0, 1.2)      | 1.1 (0.9, 1.2)     | 1.2 (1, 1.3)        | 0.004  |
| Platelets, 10 <sup>3</sup> /μL     | 110 (75, 144)       | 111 (76, 145)      | 106 (68, 137)       | 0.7    |
| Haemoglobin, g/dL                  | 13.2 (11.3, 14.7)   | 13.5 (11.7, 14.7)  | 12.3 (10.9, 14.7)   | 0.23   |
| Leucocytes, /μL                    | 5230 (4260, 6810)   | 5230 (4260, 6630)  | 5200 (4290, 6820)   | 0.79   |
| DM, n (%)                          | 49 (23.3)           | 36 (20.6)          | 13 (37.1)           | 0.05   |
| Hypertension, n (%)                | 31 (14.8)           | 23 (13.1)          | 8 (22.9)            | 0.19   |
| Dyslipidaemia, n (%)               | 14 (6.7)            | 13 (7.4)           | 1 (2.9)             | 0.47   |
| Alcoholism, n (%)                  | 28 (13.3)           | 23 (13.1)          | 5 (14.3)            | 0.79   |
| Splenomegaly, n (%)                | 157 (74.8)          | 135 (77.1)         | 22 (62.9)           | 0.09   |
| Ascites, n (%)                     | 46 (21.9)           | 35 (20.0)          | 11 (31.4)           | 0.18   |
| Varices <sup>a</sup> , n/N (%)     | 63/122 (51.6)       | 50/100 (50.0)      | 13/22 (59.1)        | 0.49   |
| MELD score                         | 10.17 (7.38, 12.38) | 9.98 (7.33, 11.91) | 11.46 (8.70, 14.97) | 0.007  |
| APRI                               | 1.94 (1.03, 2.94)   | 1.70 (0.99, 2.86)  | 2.36 (1.60, 4.93)   | 0.01   |
| REACH-B score                      | 11.5 (10,13)        | 11 (10, 13)        | 13 (11, 14)         | 0.005  |
| Antiviral agent, n (%)             |                     |                    |                     | 0.04   |
| entecavir                          | 169 (80.5)          | 137 (78.3)         | 32 (91.4)           |        |
| tenofovir                          | 25 (11.9)           | 25 (14.3)          | 0                   |        |
| telbivudine                        | 11 (5.2)            | 9 (5.1)            | 2 (5.7)             |        |
| lamivudine                         | 5 (2.4)             | 4 (2.3)            | 1 (2.9)             |        |

ALT, alanine aminotransferase; AST, aspartate aminotransferase; HBeAg, hepatitis B e antigen; HBsAg, hepatitis B s antigen; INR, international normalized ratio.

Data are expressed as median (IQR) or n (%).

<sup>a</sup>Only 122 patients had upper endoscopy at baseline.

**Table 2.** Clinical evaluation of liver cirrhosis in patients with and without liver biopsy

|                                                | With liver histology (n=24) | Without liver histology (n=186) | P    |
|------------------------------------------------|-----------------------------|---------------------------------|------|
| Sonographic features                           |                             |                                 |      |
| sonographic scores <sup>a</sup> , median (IQR) | 8 (7.5, 9)                  | 9 (8, 10)                       | 0.04 |
| splenomegaly, n (%)                            | 13 (54.2)                   | 144 (77.4)                      | 0.02 |
| ascites, n (%)                                 | 2 (8.3)                     | 44 (23.7)                       | 0.12 |
| Endoscopic findings <sup>b</sup>               |                             |                                 |      |
| oesophageal varices, n (%)                     | 3 (21.4)                    | 58 (53.7)                       | 0.04 |
| gastric varices, n (%)                         | 1 (7.1)                     | 18 (16.7)                       | 0.69 |
| any varices, n (%)                             | 4 (28.6)                    | 59 (54.6)                       | 0.09 |

<sup>a</sup>The sonographic scores comprised evaluation of liver surface, parenchyma, vascular structure and splenomegaly, with a minimum of 4 and a maximum of 11 points.

<sup>b</sup>Endoscopy was performed in 122 patients at baseline.

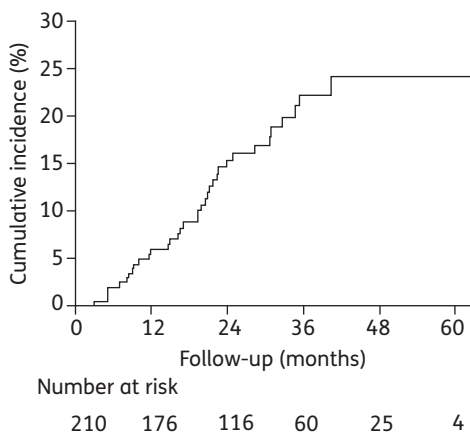

**Figure 2.** Incidence of HCC in cirrhotic patients under NUC for CHB.

among all entecavir users). Cirrhosis was clinically diagnosed in most patients whereas histological proof was available in 24 participants (11.4%). Those who were clinically diagnosed appeared to be more severe on ultrasonography and endoscopy (Table 2).

**HCC occurrence under continuous NUC therapy**

Thirty-five (16.7%) patients developed HCC during a median follow-up of 25.2 months (IQR, 16.3–37.3 months), with a cumulative incidence of 24.1% (95% CI, 16.3%–32.0%) at 5 years (Figure 2). The vast majority of HCCs ( $n=34$ ) occurred within 3 years of therapy.

Among 102 patients who had viral DNA data after 1 year, 86 patients (84.3%) had undetectable virus in serum. Except for two patients who were later confirmed to have drug resistance,

**Table 3.** Univariate and multivariate Cox regression analyses for the risk factors of HCC

| Variable                                 | Univariate analysis |           |       | Multivariate analysis |           |       |
|------------------------------------------|---------------------|-----------|-------|-----------------------|-----------|-------|
|                                          | crude HR            | 95% CI    | P     | adjusted HR           | 95% CI    | P     |
| Age, per year                            | 1.04                | 1.01–1.07 | 0.01  |                       |           |       |
| Age >55 years                            | 2.16                | 1.09–4.29 | 0.03  | 2.19                  | 1.03–4.66 | 0.04  |
| Male gender                              | 3.05                | 1.08–8.64 | 0.04  | 3.07                  | 1.05–9.02 | 0.04  |
| Body mass index, kg/m <sup>2</sup>       | 0.92                | 0.84–1.01 | 0.07  |                       |           |       |
| HBsAg >100 IU/mL                         | 0.54                | 0.19–1.55 | 0.25  |                       |           |       |
| HBeAg positive                           | 1.28                | 0.58–2.82 | 0.55  |                       |           |       |
| HBV DNA, per log IU/mL                   | 1.06                | 0.85–1.31 | 0.63  |                       |           |       |
| AST, per 10 U/L                          | 1.0                 | 0.99–1.01 | 0.90  |                       |           |       |
| ALT, per 10 U/L                          | 1.0                 | 0.98–1.01 | 0.76  |                       |           |       |
| α-Fetoprotein, ng/mL                     | 1.0                 | 1.0–1.0   | 0.95  |                       |           |       |
| Bilirubin, per mg/dL                     | 1.0                 | 0.90–1.10 | 0.93  |                       |           |       |
| INR, per unit                            | 2.26                | 0.72–7.10 | 0.16  |                       |           |       |
| Creatinine, per mg/dL                    | 1.14                | 0.93–1.41 | 0.20  |                       |           |       |
| Platelets, per 10 <sup>3</sup> cells/μL  | 1.0                 | 0.99–1.01 | 0.73  |                       |           |       |
| Haemoglobin, per g/dL                    | 0.92                | 0.80–1.05 | 0.21  |                       |           |       |
| Leucocytes, per 10 <sup>3</sup> cells/μL | 1.06                | 0.94–1.20 | 0.32  |                       |           |       |
| DM <sup>a</sup>                          | 2.13                | 1.07–4.23 | 0.03  | 3.49                  | 1.54–7.91 | 0.003 |
| Hypertension                             | 1.63                | 0.74–3.60 | 0.22  |                       |           |       |
| Dyslipidaemia                            | 0.34                | 0.05–2.50 | 0.29  |                       |           |       |
| Alcoholism                               | 1.16                | 0.45–3.00 | 0.76  |                       |           |       |
| Splenomegaly                             | 0.63                | 0.32–1.25 | 0.19  |                       |           |       |
| Ascites                                  | 2.11                | 1.03–4.32 | 0.04  |                       |           |       |
| MELD score, per point                    | 1.06                | 1.01–1.12 | 0.02  |                       |           |       |
| MELD score >12 points                    | 2.69                | 1.38–5.23 | 0.004 | 2.16                  | 1.10–4.23 | 0.03  |
| APRI, per point                          | 1.01                | 0.95–1.06 | 0.83  |                       |           |       |
| REACH-B score, per point                 | 1.23                | 1.04–1.45 | 0.02  |                       |           |       |
| Antiviral therapy                        |                     |           |       |                       |           |       |
| entecavir                                | 1                   |           |       |                       |           |       |
| tenofovir                                | <sup>b</sup>        |           |       |                       |           |       |
| telbivudine                              | 1.18                | 0.28–4.99 | 0.82  |                       |           |       |
| lamivudine                               | 1.33                | 0.18–9.73 | 0.78  |                       |           |       |

ALT, alanine aminotransferase; AST, aspartate aminotransferase; HBeAg, hepatitis B e antigen; HBsAg, hepatitis B s antigen; INR, international normalized ratio.

<sup>a</sup>Adjusted for use of metformin in the multivariate analysis.

<sup>b</sup>Not calculable due to no HCC in tenofovir users.

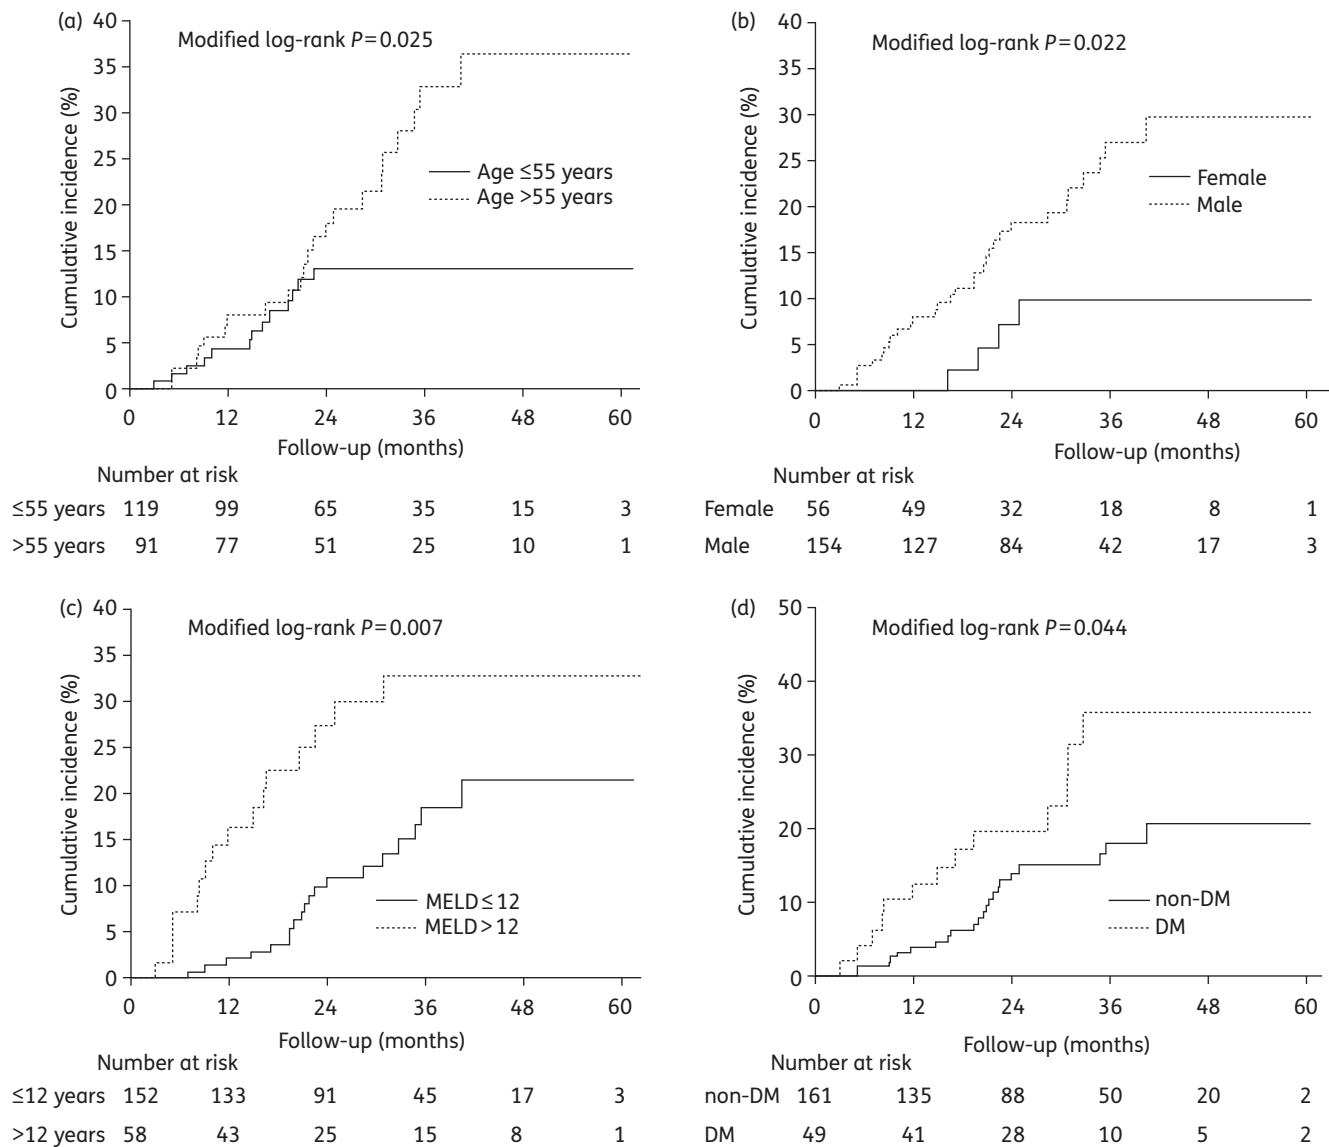

**Figure 3.** Incidence of HCC stratified by risk factors at baseline. (a) Stratified by age  $> 55$  or  $\leq 55$  years. (b) Stratified by gender. (c) Stratified by MELD score  $> 12$  or  $\leq 12$  points. (d) Stratified by DM.

all of the patients with detectable HBV DNA had a viral load  $< 300$  IU/mL (median, 34 IU/mL; IQR, 7–248 IU/mL).

**Univariate and multivariate-adjusted factors predictive of HCC under NUC**

In the univariate Cox regression analyses (Table 3), age, gender, diabetes mellitus (DM), ascites and MELD and REACH-B scores were associated with HCC. In the multivariate-adjusted analysis including adjustment for antidiabetes drugs in diabetic patients, older age, male gender, higher MELD score and DM were independent risk factors.

Age  $> 55$  years, male gender, MELD score  $> 12$  points and DM significantly discriminated the risk of HCC (Figure 3). Interestingly, the incidence of HCC was significantly lower in diabetic patients who took metformin than in those who used other drugs (Figure S1, available as Supplementary data at JAC Online).

**Risk score to predict the occurrence of HCC**

These independent risk factors were weighted according to their regression coefficients in the Cox model (Table 4). The simplified calculation using integers was as accurate as that based on the original formula for predicting HCC (Figure 4a). Information on antidiabetes medication significantly improved the performance of the predictive model (Figure S2, available as Supplementary data at JAC Online). A risk score of  $\geq 5$  points significantly discriminated patients at high risk of HCC (Figure 4b), with sensitivity and specificity of 82.9% and 62.3%, respectively.

**Discussion**

This study revealed that despite potent antiviral treatment, HCC still occurred frequently in cirrhotic patients with highly viraemic CHB. Age, gender, hepatic dysfunction and DM were independent

risk factors revealed in the multivariate-adjusted analysis. In addition, information on antidiabetes medication was associated with improvement of risk stratification in diabetic patients. Our findings not only demonstrate that HCC surveillance remains essential in CHB patients under antiviral treatment, but also reveal those who require particular attention. Furthermore, this research underscores the unmet need for therapies beyond viral suppression to further attenuate risks in patients with advanced CHB.

Characterized by liver cirrhosis, male predominance, advanced age and high serum level of HBV DNA, this cohort consists of patients at extremely high risk of HCC.<sup>20,21</sup> Although emerging data indicate that cirrhosis may regress in NUC users, apparently this takes time, usually requiring  $\geq 5$  years.<sup>7,8</sup> Importantly, we did not find that markers of viral activity, i.e. concentration of viral DNA or serology of hepatitis B e antigen, could stratify the risk, in contrast to previous studies of untreated CHB. Therefore, our findings exemplify the importance of different models for distinct scenarios. In view of the widespread use of NUCs for CHB, there is

an urgent need for more knowledge to better understand the risk stratification in patients under treatment. Of note, our study focused on pretreatment factors that determined later development of HCC, but did not address their dynamic changes. Some parameters such as  $\alpha$ -fetoprotein may change during treatment in association with the occurrence of HCC.<sup>22,23</sup>

Because age and hepatic dysfunction indicate the chronicity and severity of accumulated hepatic damage, our data suggest that hepatocarcinogenesis in long-standing HBV infection cannot be sufficiently abolished by viral inhibition, at least not within 3 years of therapy. Longer observation is warranted to further elucidate the pattern and predictors of HCC occurring alongside NUC treatment. Besides, the sexual dimorphism in HCC probably results from mechanisms beyond viral carcinogenesis<sup>24,25</sup> and therefore it may require a targeted therapy to attenuate the risk conferred by male gender.

A number of studies have shown the association between DM and HCC,<sup>26,27</sup> although the exact mechanism is incompletely understood.<sup>28</sup> Moreover, a recent study reported that diabetic patients were less likely to have cirrhosis regress after NUC therapy.<sup>8</sup> Our data further indicate that DM is becoming a major outcome determinant of CHB in the era of antiviral therapy. We also found an inverse association between metformin use and HCC risk, in line with existing literature.<sup>29,30</sup> Because metformin is a first-line agent that diabetic patients usually start with, its use may identify those with early or mild DM and therefore confound the association. Whether there is antitumour efficacy associated with metformin is certainly interesting<sup>31</sup> but beyond the scope of the present research. Regardless, our data support that information on antidiabetes medication is valuable for assessing the risk of HCC in diabetic patients.

Our study has the following strengths. First, stringent criteria for clinical diagnosis ascertained the presence of cirrhosis and enabled application of our findings to a clear patient group. Second, since virological data after 1 year of treatment attested potent viral inhibition, therapeutic efficacy was unlikely to confound the analysis. Furthermore, the competing risk analysis

**Table 4.**  $\beta$  Coefficient in the Cox proportional hazard model and the corresponding risk scores to predict development of HCC

|                             | $\beta$ coefficient | 95% CI     | Score |
|-----------------------------|---------------------|------------|-------|
| Age                         |                     |            |       |
| >55 years                   | 0.78                | 0.08–1.48  | 2     |
| Gender                      |                     |            |       |
| male                        | 1.11                | 0.05–2.17  | 3     |
| MELD score                  |                     |            |       |
| >12 points                  | 0.76                | 0.07–1.45  | 2     |
| DM                          |                     |            |       |
| diabetics using metformin   | -0.55               | -1.76–0.66 | 0     |
| diabetics without metformin | 1.31                | 0.53–2.10  | 3     |

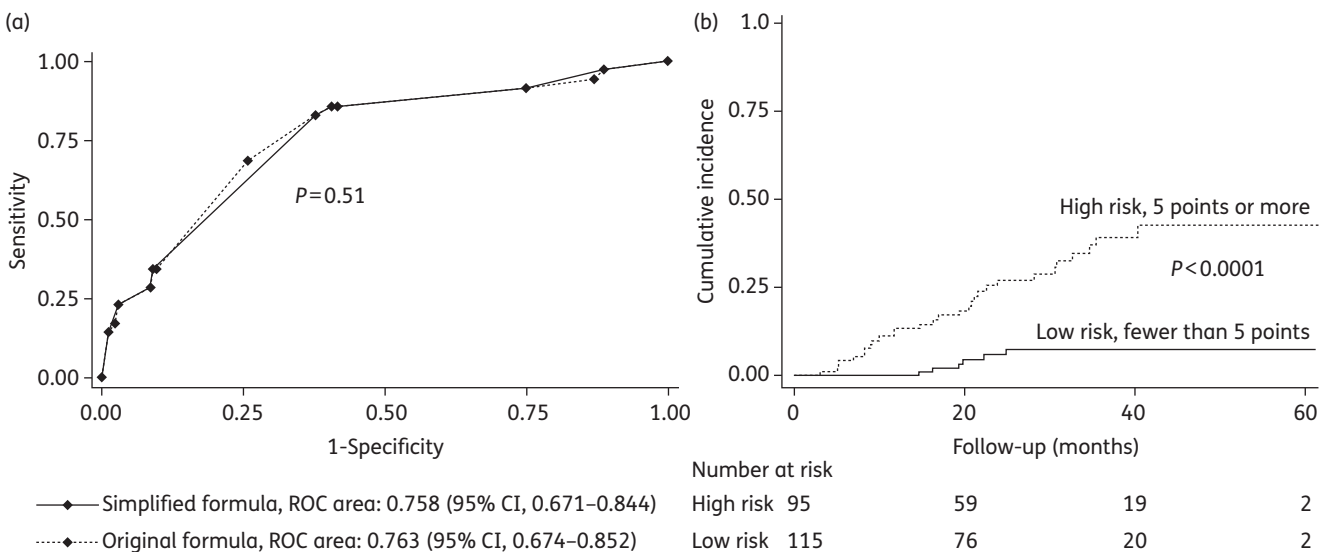

**Figure 4.** Performance of the risk scores based on the baseline risk factors. (a) The receiver operating characteristic curves of the predictive formula to predict HCC. (b) A risk score of  $\geq 5$  points identifies patients at high risk of HCC.

accounted for the influence of mortality on estimating the incidence of HCC.<sup>32</sup> Finally, all patients were followed up at an interval of 3 months or less, allowing timely detection of HCC.

The following limitations are noted. First, it requires external validation to extrapolate our conclusion to patients without cirrhosis. Second, we were unable to explore some potentially important factors, including HBV genotype, familial predisposition, exposure to aflatoxin and coinfection with hepatitis D virus (HDV). Incorporation of family history into an analysis could introduce recall bias, especially when most participants were >50 years old. Check-up of HDV is regrettably not a routine practice receiving reimbursement in Taiwan where the prevalence is low.<sup>33,34</sup> Nevertheless, previous landmark studies from Asia did not find HDV was a significant determinant of HCC.<sup>17,20,21</sup> Finally, this single-centre study from a referral hospital could not rule out the possibility of selection bias.

In summary, cirrhotic patients with HBV viraemia still have a high risk of HCC despite treatment with NUCs, at least in the first 3 years of therapy. A clinically convenient model based on routinely available parameters that comprise age >55 years, male gender, MELD score >12 points, DM and medication for DM can stratify the risk.

## Acknowledgements

Preliminary results were presented at the United European Gastroenterology Week (UEGW), Berlin, Germany, 2013 (OP234 in the viral hepatitis B session).

We are grateful to Dr Hsiu J. Ho, Ms Jing-Ju Lee and Ms Ya-Li Tseng for their assistance.

## Funding

This study was supported by research grants from the E-Da Hospital (EDAHP-101009) and the Tomorrow Medical Foundation (Grant No.102-3).

## Transparency declarations

Y.-C. H. has received lecture fees from GlaxoSmithKline, Novartis, Bristol-Myers Squibb and the Harvester Trading Co. (the authorized distributor of tenofovir in Taiwan). J.-T. L. has received research support for another study from Gilead Sciences. All other authors: none to declare.

## Supplementary data

Figures S1 and S2 are available as Supplementary data at JAC Online (<http://jac.oxfordjournals.org/>).

## References

- El-Serag HB. Epidemiology of viral hepatitis and hepatocellular carcinoma. *Gastroenterology* 2012; **142**: 1264–1273.e1.
- Bruix J, Sherman M. Management of hepatocellular carcinoma: an update. *Hepatology* 2011; **53**: 1020–2.
- Chen CJ, Yang HI, Su J et al. Risk of hepatocellular carcinoma across a biological gradient of serum hepatitis B virus DNA level. *JAMA* 2006; **295**: 65–73.
- Tseng TC, Liu CJ, Yang HC et al. High levels of hepatitis B surface antigen increase risk of hepatocellular carcinoma in patients with low HBV load. *Gastroenterology* 2012; **142**: 1140–1149.e3; quiz e13–4.
- Osborn MK, Lok AS. Antiviral options for the treatment of chronic hepatitis B. *J Antimicrob Chemother* 2006; **57**: 1030–4.
- Liaw YF, Sung JJ, Chow WC et al. Lamivudine for patients with chronic hepatitis B and advanced liver disease. *N Engl J Med* 2004; **351**: 1521–31.
- Chang TT, Liaw YF, Wu SS et al. Long-term entecavir therapy results in the reversal of fibrosis/cirrhosis and continued histological improvement in patients with chronic hepatitis B. *Hepatology* 2010; **52**: 886–93.
- Marcellin P, Gane E, Buti M et al. Regression of cirrhosis during treatment with tenofovir disoproxil fumarate for chronic hepatitis B: a 5-year open-label follow-up study. *Lancet* 2013; **381**: 468–75.
- Wu CY, Chen YJ, Ho HJ et al. Association between nucleoside analogues and risk of hepatitis B virus-related hepatocellular carcinoma recurrence following liver resection. *JAMA* 2012; **308**: 1906–14.
- Hosaka T, Suzuki F, Kobayashi M et al. Long-term entecavir treatment reduces hepatocellular carcinoma incidence in patients with hepatitis B virus infection. *Hepatology* 2013; **58**: 98–107.
- Sherman M. Does hepatitis B treatment reduce the incidence of hepatocellular carcinoma? *Hepatology* 2013; **58**: 18–20.
- Hung CH, Lu SN, Wang JH et al. Correlation between ultrasonographic and pathologic diagnoses of hepatitis B and C virus-related cirrhosis. *J Gastroenterol* 2003; **38**: 153–7.
- Poon D, Anderson BO, Chen LT et al. Management of hepatocellular carcinoma in Asia: consensus statement from the Asian Oncology Summit 2009. *Lancet Oncol* 2009; **10**: 1111–8.
- Lin CW, Lin CC, Mo LR et al. Heavy alcohol consumption increases the incidence of hepatocellular carcinoma in hepatitis B virus-related cirrhosis. *J Hepatol* 2013; **58**: 730–5.
- Malinchoc M, Kamath PS, Gordon FD et al. A model to predict poor survival in patients undergoing transjugular intrahepatic portosystemic shunts. *Hepatology* 2000; **31**: 864–71.
- Wai CT, Greenson JK, Fontana RJ et al. A simple noninvasive index can predict both significant fibrosis and cirrhosis in patients with chronic hepatitis C. *Hepatology* 2003; **38**: 518–26.
- Yang HI, Yuen MF, Chan HL et al. Risk estimation for hepatocellular carcinoma in chronic hepatitis B (REACH-B): development and validation of a predictive score. *Lancet Oncol* 2011; **12**: 568–74.
- Gray RJ. A class of K-sample tests for comparing the cumulative incidence of a competing risk. *Ann Stat* 1988; **16**: 1141–54.
- Fine JP, Gray RJ. A proportional hazards model for the subdistribution of a competing risk. *JASA* 1999; **94**: 496–509.
- Yuen MF, Tanaka Y, Fong DY et al. Independent risk factors and predictive score for the development of hepatocellular carcinoma in chronic hepatitis B. *J Hepatol* 2009; **50**: 80–8.
- Wong VW, Chan SL, Mo F et al. Clinical scoring system to predict hepatocellular carcinoma in chronic hepatitis B carriers. *J Clin Oncol* 2010; **28**: 1660–5.
- Asahina Y, Tsuchiya K, Nishimura T et al.  $\alpha$ -Fetoprotein levels after interferon therapy and risk of hepatocarcinogenesis in chronic hepatitis C. *Hepatology* 2013; **58**: 1253–62.
- Wong GL, Chan HL, Tse YK et al. On-treatment  $\alpha$ -fetoprotein is a specific tumor marker for hepatocellular carcinoma in patients with chronic hepatitis B receiving entecavir. *Hepatology* 2014; doi:10.1002/hep.26739.
- Li Z, Tuteja G, Schug J et al. Foxa1 and Foxa2 are essential for sexual dimorphism in liver cancer. *Cell* 2012; **148**: 72–83.

- 25** Ma WL, Hsu CL, Wu MH *et al.* Androgen receptor is a new potential therapeutic target for the treatment of hepatocellular carcinoma. *Gastroenterology* 2008; **135**: 947–955.e5.
- 26** El-Serag HB, Hampel H, Javadi F. The association between diabetes and hepatocellular carcinoma: a systematic review of epidemiologic evidence. *Clin Gastroenterol Hepatol* 2006; **4**: 369–80.
- 27** Chen CL, Yang HI, Yang WS *et al.* Metabolic factors and risk of hepatocellular carcinoma by chronic hepatitis B/C infection: a follow-up study in Taiwan. *Gastroenterology* 2008; **135**: 111–21.
- 28** Siddique A, Kowdley KV. Insulin resistance and other metabolic risk factors in the pathogenesis of hepatocellular carcinoma. *Clin Liver Dis* 2011; **15**: 281–96, vii–x.
- 29** Singh S, Singh PP, Singh AG *et al.* Anti-diabetic medications and the risk of hepatocellular cancer: a systematic review and meta-analysis. *Am J Gastroenterol* 2013; **108**: 881–91; quiz 892.
- 30** Chen HP, Shieh JJ, Chang CC *et al.* Metformin decreases hepatocellular carcinoma risk in a dose-dependent manner: population-based and in vitro studies. *Gut* 2013; **62**: 606–15.
- 31** Pernicova I, Korbonits M. Metformin—mode of action and clinical implications for diabetes and cancer. *Nat Rev Endocrinol* 2014; **10**: 143–56.
- 32** Hsu YC, Ho HJ, Wu MS *et al.* Postoperative peg-interferon plus ribavirin is associated with reduced recurrence of hepatitis C virus-related hepatocellular carcinoma. *Hepatology* 2013; **58**: 150–7.
- 33** Huo TI, Wu JC, Lin RY *et al.* Decreasing hepatitis D virus infection in Taiwan: an analysis of contributory factors. *J Gastroenterol Hepatol* 1997; **12**: 747–51.
- 34** Pascarella S, Negro F. Hepatitis D virus: an update. *Liver Int* 2011; **31**: 7–21.
